# Supplementary material for: Interplay between many body effects and Coulomb screening in the optical bandgap of atomically thin MoS2
Source: Royal Society of Chemistry journal article supplement (doi:10.1039/c7nr01834g), 2017-01-01
Supplement: c7nr01834g1.pdf [file c7nr01834g1.pdf]

*Supporting information on*

**Interplay between many body effects and Coulomb screening in optical bandgap of atomically thin MoS<sub>2</sub>**

Youngsin Park,<sup>†a</sup> Sang Wook Han,<sup>†b</sup> Christopher C. S. Chan,<sup>c</sup> Benjamin P. L. Reid,<sup>c</sup> Robert A.

Taylor,<sup>\*c</sup> Nammi Kim,<sup>d</sup> Yongcheol Jo,<sup>e</sup> Hyunsik Im<sup>\*e</sup> and Kwang S. Kim<sup>\*a</sup>

---

<sup>a.</sup> *Department of Chemistry and Physics, School of Natural Science, Ulsan National Institute of Science and Technology, Ulsan 44919, Korea. E-mail: kimks@unist.ac.kr*

<sup>b.</sup> *Department of Physics and Energy Harvest & Storage Research Center, University of Ulsan, Ulsan 44610, Korea.*

<sup>c.</sup> *Clarendon Laboratory, Department of Physics, University of Oxford, Oxford, OX1 3PU, UK. E-mail: robert.taylor@physics.ox.ac.uk*

<sup>d.</sup> *Department of Physics, Soongsil University, Seoul 06978, Korea.*

<sup>e.</sup> *Division of Physics and Semiconductor Science, Dongguk University, Seoul 04620, Korea. E-mail: hyunsik7@dongguk.edu*

† These authors contributed equally to this work.

The PL intensity in the bi-layer of MoS<sub>2</sub> is larger than that in the mono-layer at 4.2 K, and this feature is what is measured in our MoS<sub>2</sub> sample. However, at 300 K (room temperature) the PL intensity in the monolayer of MoS<sub>2</sub> becomes larger, as expected. We confirmed this behavior for different 1L and 2L MoS<sub>2</sub> flakes (Fig. S1). Presently, we do not fully understand why the A exciton of 2L-MoS<sub>2</sub> becomes stronger than that of 1L-MoS<sub>2</sub> at low temperatures. We have not found relevant literature which deals with this phenomenon. It is known that the PL curve and intensity of atomically thin MoS<sub>2</sub> are affected by defects, substrate as well as layer number. Thus, we presume that complex temperature-dependent interplay between these factors is linked to this observation. But, we cannot exclude the possibility of inherent material properties of atomically thin MoS<sub>2</sub>. Currently we are working on this issue and will be reported elsewhere.

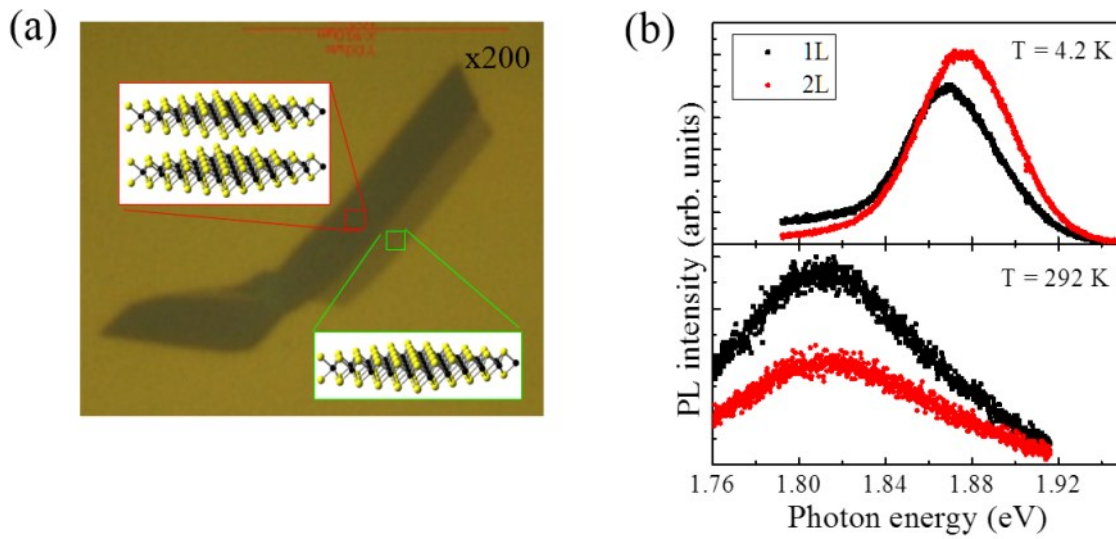

**Fig. S1.** (a) Optical microscopy image of 1L and 2L MoS<sub>2</sub> on a SiO<sub>2</sub>/Si substrate and (b) temperature dependent PL spectra of 1L and 2L MoS<sub>2</sub>.

Indeed, in order to assure the minor effect of localized heating (due to the excitation laser) on the PL peak shift in 1L MoS<sub>2</sub>, we measured temperature-dependent PL peak at a low excitation power (Fig. S2). As the temperature increases the PL peak remains unchanged

below  $\sim 100$  K. The most noticeable feature in the temperature-dependent PL characteristics is its dramatic decrease in peak's height. On the contrary, the observed PL peak's height increases linearly with the excitation power. Thus, considering the excitation power dependent PL peak's height and unchanged PL peak's position below 100 K, it is quite reasonable to presume that the influence of localized heating due to the excitation laser is insignificant.

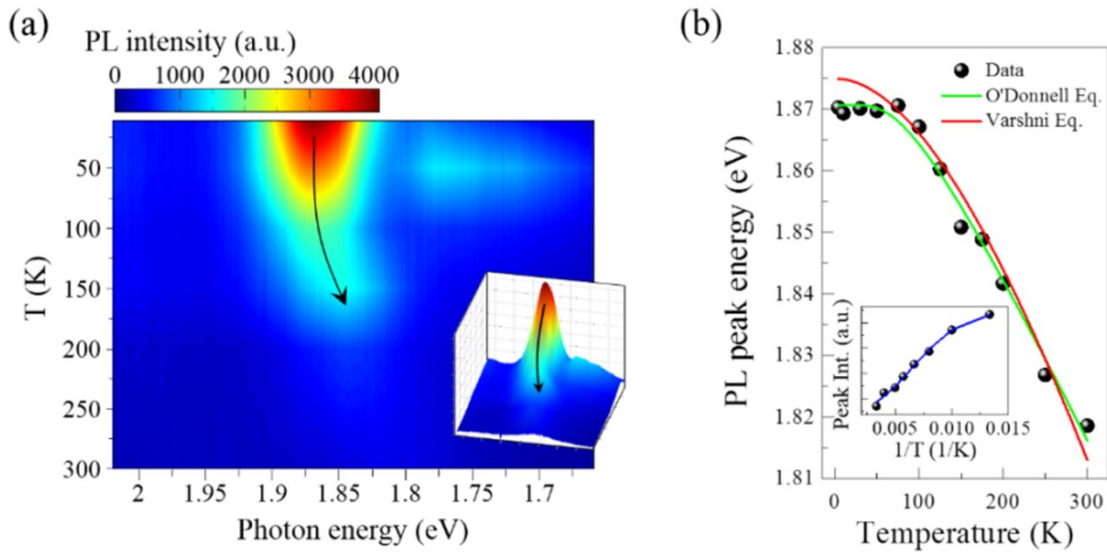

**Fig. S2.** (a) Intensity map of the temperature dependent PL spectrum of 1L MoS<sub>2</sub> and (b) temperature dependent PL peak energy together with fitting curves.
